# Supplementary material for: Inappropriate use of the emergency department for nonurgent conditions: Patient characteristics and associated factors at a Japanese hospital
Source: PubMed Central journal article supplement — J Gen Fam Med. 2019 Apr 29;20(4):146–53. doi: 10.1002/jgf2.249 (PMC6612776; doi:10.1002/jgf2.249), 2019-04-29
Supplement: JGF2-20-146-s001.pdf [file JGF2-20-146-s001.pdf]

Supporting Information 1. Questionnaire for patients visited the department of general medicine during consultation hours

Q1: How many times did you visit a hospital emergency department (including other hospitals) out-of-hours in the past 3 years? Please place a check mark next to the response that most closely reflects your situation.

- 0 times
- 1 time
- 2 or more times

Q2: Do you have your own primary care physician?

- Yes  
(Where is that physician located?  This hospital  Another clinic or hospital)
- No

Q3: Do you regularly visit a clinic or hospital?

- Yes  
(Which hospital is it?  This hospital  Another clinic or hospital)
- No

Q4: Please check  the responses that most closely reflect your opinions about reasons why you sought care today.

|                                                                       | Yes                                 | Somewhat agree           | No                       | Absolutely not agree     |
|-----------------------------------------------------------------------|-------------------------------------|--------------------------|--------------------------|--------------------------|
| (Example of description) Because I ~                                  | <input checked="" type="checkbox"/> | <input type="checkbox"/> | <input type="checkbox"/> | <input type="checkbox"/> |
| 1. Because I desired to be cured quickly                              | <input type="checkbox"/>            | <input type="checkbox"/> | <input type="checkbox"/> | <input type="checkbox"/> |
| 2. Because my condition was not improving                             | <input type="checkbox"/>            | <input type="checkbox"/> | <input type="checkbox"/> | <input type="checkbox"/> |
| 3. Because over-the-counter medicine was not working                  | <input type="checkbox"/>            | <input type="checkbox"/> | <input type="checkbox"/> | <input type="checkbox"/> |
| 4. Because I wanted a doctor's opinion                                | <input type="checkbox"/>            | <input type="checkbox"/> | <input type="checkbox"/> | <input type="checkbox"/> |
| 5. Because I wanted to know whether the condition was serious         | <input type="checkbox"/>            | <input type="checkbox"/> | <input type="checkbox"/> | <input type="checkbox"/> |
| 6. Because I wanted to know if I could attend work, school, or events | <input type="checkbox"/>            | <input type="checkbox"/> | <input type="checkbox"/> | <input type="checkbox"/> |
| 7. Because I wanted laboratory tests done                             | <input type="checkbox"/>            | <input type="checkbox"/> | <input type="checkbox"/> | <input type="checkbox"/> |
| 8. Because I wanted a prescription                                    | <input type="checkbox"/>            | <input type="checkbox"/> | <input type="checkbox"/> | <input type="checkbox"/> |
| 9. Because I wanted an intravenous drip                               | <input type="checkbox"/>            | <input type="checkbox"/> | <input type="checkbox"/> | <input type="checkbox"/> |

|                                                 |                          |                          |                          |                          |
|-------------------------------------------------|--------------------------|--------------------------|--------------------------|--------------------------|
| 10. Because I desired treatment by a specialist | <input type="checkbox"/> | <input type="checkbox"/> | <input type="checkbox"/> | <input type="checkbox"/> |
| 11. Because of recommended by others            | <input type="checkbox"/> | <input type="checkbox"/> | <input type="checkbox"/> | <input type="checkbox"/> |
|                                                 | Yes                      | Somewhat<br>agree        | No                       | Absolutely<br>not agree  |

Q5: Read each item and please circle the answer which comes closest to how you have been feeling, on the average, in the past week. Don't take too long over your answers; your immediate reaction to each item will probably be more accurate than a long thought out response.

1. I feel tense or 'wound up':

- a. Most of the time
- b. A lot of the time
- c. From time to time, occasionally
- d. Not at all

2. I still enjoy the things I used to enjoy:

- a. Definitely as much
- b. Not quite so much
- c. Only a little
- d. Hardly at all

3. I get a sort of frightened feeling as if something awful is about to happen:

- a. Very definitely and quite badly
- b. Yes, but not too badly
- c. A little, but it doesn't worry me
- d. Not at all

4. I can laugh and see the funny side of things:

- a. As much as I always could
- b. Not quite so much now
- c. Definitely not so much now
- d. Not at all

5. Worrying thoughts go through my mind:

- a. A great deal of the time
- b. A lot of the time
- c. From time to time but not too often
- d. Only occasionally

6. I feel cheerful:

- a. Not at all
- b. Not often
- c. Sometimes
- d. Most of the time

7. I can sit at ease and feel relaxed:

- a. Definitely
- b. Usually
- c. Not often

d. Not at all

8. I feel as if I am slowed down:

- a. Nearly all the time
- b. Very often
- c. Sometimes
- d. Not at all

9. I get a sort of frightened feeling like 'butterflies' in the stomach:

- a. Not at all
- b. Occasionally
- c. Quite often
- d. Very often

10. I have lost interest in my appearance:

- a. Definitely
- b. I don't take as much care as I should
- c. I may not take quite as much care
- d. I take just as much care as ever

11. I feel restless as if I have to be on the move:

- a. Very much indeed
- b. Quite a lot
- c. Not very much
- d. Not at all

12. I look forward with enjoyment to things:

- a. As much as ever I did
- b. Rather less than I used to
- c. Definitely less than I used to
- d. Hardly at all

13. I get sudden feelings of panic:

- a. Very often indeed
- b. Quite often
- c. Not very often
- d. Not at all

14. I can enjoy a good book or radio or TV program:

- a. Often
- b. Sometimes
- c. Not often
- d. Very seldom

Q6: Are there out-of-hours primary care clinics in your local area?

- Yes
- No
- I don't know

Q7: Please circle the most applicable answer about yourself, or please fill out.

7(a): Marital status

1. Unmarried    2. Married    3. Divorced    4. Widowed    5. Other

7(b): Number of cohabitants (including yourself)

(       )

7(c): Occupation (employment status)

1. Regular employee    2. Temporary staff    3. Part-time employee  
4. Self-employed    5. Executive    6. Student  
7. Unemployed    8. Stay-at-home    9. Other (       )

7(d): Educational status

1. Elementary school or junior high school    2. High school  
3. Specialized training college or miscellaneous school    4. Junior college or college of  
technology    5. University    6. Graduate school    7. Other (       )

Supporting Information 2. Questionnaire for out-of-hours emergency department patients

Q1: How many times did you visit a hospital emergency department (including other hospitals) out-of-hours in the past 3 years? Please place a check mark next to the response that most closely reflects your situation.

- 0 times
- 1 time
- 2 or more times

Q2: Do you have your own primary care physician?

- Yes  
(Where is that physician located?  This hospital  Another clinic or hospital)
- No

Q3: Do you regularly visit a clinic or hospital?

- Yes  
(Which hospital is it?  This hospital  Another clinic or hospital)
- No

Q4: Please check  the responses that most closely reflect your opinions about reasons why you sought care today.

|                                                                       | Yes                                 | Somewhat agree           | No                       | Absolutely not agree     |
|-----------------------------------------------------------------------|-------------------------------------|--------------------------|--------------------------|--------------------------|
| (Example of description) Because I ~                                  | <input checked="" type="checkbox"/> | <input type="checkbox"/> | <input type="checkbox"/> | <input type="checkbox"/> |
| 1. Because I desired to be cured quickly                              | <input type="checkbox"/>            | <input type="checkbox"/> | <input type="checkbox"/> | <input type="checkbox"/> |
| 2. Because my condition was not improving                             | <input type="checkbox"/>            | <input type="checkbox"/> | <input type="checkbox"/> | <input type="checkbox"/> |
| 3. Because over-the-counter medicine was not working                  | <input type="checkbox"/>            | <input type="checkbox"/> | <input type="checkbox"/> | <input type="checkbox"/> |
| 4. Because I wanted a doctor's opinion                                | <input type="checkbox"/>            | <input type="checkbox"/> | <input type="checkbox"/> | <input type="checkbox"/> |
| 5. Because I wanted to know whether the condition was serious         | <input type="checkbox"/>            | <input type="checkbox"/> | <input type="checkbox"/> | <input type="checkbox"/> |
| 6. Because I wanted to know if I could attend work, school, or events | <input type="checkbox"/>            | <input type="checkbox"/> | <input type="checkbox"/> | <input type="checkbox"/> |
| 7. Because I wanted laboratory tests done                             | <input type="checkbox"/>            | <input type="checkbox"/> | <input type="checkbox"/> | <input type="checkbox"/> |
| 8. Because I wanted a prescription                                    | <input type="checkbox"/>            | <input type="checkbox"/> | <input type="checkbox"/> | <input type="checkbox"/> |
| 9. Because I wanted an intravenous drip                               | <input type="checkbox"/>            | <input type="checkbox"/> | <input type="checkbox"/> | <input type="checkbox"/> |

|                                                                              |                          |                          |                          |                          |
|------------------------------------------------------------------------------|--------------------------|--------------------------|--------------------------|--------------------------|
| 10. Because I desired treatment by a specialist                              | <input type="checkbox"/> | <input type="checkbox"/> | <input type="checkbox"/> | <input type="checkbox"/> |
| 11. Because of recommended by others                                         | <input type="checkbox"/> | <input type="checkbox"/> | <input type="checkbox"/> | <input type="checkbox"/> |
| 12. Because of inability to take time off from school or work during the day | <input type="checkbox"/> | <input type="checkbox"/> | <input type="checkbox"/> | <input type="checkbox"/> |
|                                                                              | Yes                      | Somewhat agree           | No                       | Absolutely not agree     |

Q5: Read each item and please circle the answer which comes closest to how you have been feeling, on the average, in the past week. Don't take too long over your answers; your immediate reaction to each item will probably be more accurate than a long thought out response.

1. I feel tense or 'wound up':

- a. Most of the time
- b. A lot of the time
- c. From time to time, occasionally
- d. Not at all

2. I still enjoy the things I used to enjoy:

- a. Definitely as much
- b. Not quite so much
- c. Only a little
- d. Hardly at all

3. I get a sort of frightened feeling as if something awful is about to happen:

- a. Very definitely and quite badly
- b. Yes, but not too badly
- c. A little, but it doesn't worry me
- d. Not at all

4. I can laugh and see the funny side of things:

- a. As much as I always could
- b. Not quite so much now
- c. Definitely not so much now
- d. Not at all

5. Worrying thoughts go through my mind:

- a. A great deal of the time
- b. A lot of the time
- c. From time to time but not too often
- d. Only occasionally

6. I feel cheerful:

- a. Not at all
- b. Not often
- c. Sometimes
- d. Most of the time

7. I can sit at ease and feel relaxed:

- a. Definitely
- b. Usually
- c. Not often



d. Not at all

8. I feel as if I am slowed down:

- a. Nearly all the time
- b. Very often
- c. Sometimes
- d. Not at all

9. I get a sort of frightened feeling like 'butterflies' in the stomach:

- a. Not at all
- b. Occasionally
- c. Quite often
- d. Very often

10. I have lost interest in my appearance:

- a. Definitely
- b. I don't take as much care as I should
- c. I may not take quite as much care
- d. I take just as much care as ever

11. I feel restless as if I have to be on the move:

- a. Very much indeed
- b. Quite a lot
- c. Not very much
- d. Not at all

12. I look forward with enjoyment to things:

- a. As much as ever I did
- b. Rather less than I used to
- c. Definitely less than I used to
- d. Hardly at all

13. I get sudden feelings of panic:

- a. Very often indeed
- b. Quite often
- c. Not very often
- d. Not at all

14. I can enjoy a good book or radio or TV program:

- a. Often
- b. Sometimes
- c. Not often
- d. Very seldom

Q6: Are there out-of-hours primary care clinics in your local area?

- Yes
- No
- I don't know

Q7: Please circle the most applicable answer about yourself, or please fill out.

7(a): Marital status

1. Unmarried    2. Married    3. Divorced    4. Widowed    5. Other

7(b): Number of cohabitants (including yourself)

(       )

7(c): Occupation (employment status)

1. Regular employee    2. Temporary staff    3. Part-time employee  
4. Self-employed    5. Executive    6. Student  
7. Unemployed    8. Stay-at-home    9. Other (       )

7(d): Educational status

1. Elementary school or junior high school    2. High school  
3. Specialized training college or miscellaneous school    4. Junior college or college of  
technology    5. University    6. Graduate school    7. Other (       )

Supporting Information 3.

Questionnaire for regular consultation hours general medicine physicians

Exclusion

- >3 days from symptom onset    Chief complaint is traumatic injury    Triage level 1-3  
 Hospitalization or referral to another medical facility    Other

Please check  triage level of this patient.

- Level 4: Less Urgent    Level 5: Non-urgent

Age   **【        】** years old

Sex    Male    Female

Chief complaint (Up to 3 symptoms)

1. fever    2. cough    3. diarrhea    4. sore throat    5. headache  
 6. abdominal pain    7. dizziness  
Other **【        】**

Duration since symptom onset    few hours    half a day    1 day    2–3 days

Diagnosis

- a. Acute upper respiratory infection    b. Acute bronchitis    c. Asthma  
 d. Pneumonia  
 e. Acute gastroenteritis    f. Peptic/duodenal ulcer    g. Cholelithiasis  
 h. Urticaria    i. Cellulitis    j. Allergy/allergic reaction  
 k. Urinary tract infection    l. Urinary calculus  
 m. Musculoskeletal disorder    n. Psychological disorder    o. No disease  
 Other **【        】**

|           |                 |                                    |                                     |
|-----------|-----------------|------------------------------------|-------------------------------------|
| Procedure | Prescription    | <input type="checkbox"/> 0. Absent | <input type="checkbox"/> 1. Present |
|           | Imaging         | <input type="checkbox"/> 0. Absent | <input type="checkbox"/> 1. Present |
|           | Laboratory test | <input type="checkbox"/> 0. Absent | <input type="checkbox"/> 1. Present |
|           | Treatment       | <input type="checkbox"/> 0. Absent | <input type="checkbox"/> 1. Present |

Supporting Information 4.

Questionnaire for out-of-hours emergency department physicians and triage nurses

Exclusion

- >3 days from symptom onset
- Chief complaint is traumatic injury
- Triage level 1-3
- Hospitalization or referral to another medical facility
- Other

For triage nurse

Please check  triage level of this patient.

- Level 4: Less Urgent
- Level 5: Non-urgent

For physician in charge of consultation for this patient

Please check  whether it was necessary to use out-of-hours emergency medical care, for this patient's results of consultation.

- Necessary  
(ex. needed intravenous drip, antibiotics, laboratory test, or treatment, etc.)
- Unnecessary  
(ex. needed symptomatic treatment only, no need for follow-up, no prescription, etc.)

Age   【       】 years old

Sex    Male    Female

Chief complaint (Up to 3 symptoms)

- 1. fever    2. cough    3. diarrhea    4. sore throat    5. headache
- 6. abdominal pain    7. dizziness
- Other 【       】 【       】 【       】

Duration since symptom onset    few hours    half a day    1 day    2-3 days

Diagnosis

- a. Acute upper respiratory infection    b. Acute bronchitis    c. Asthma
- d. Pneumonia
- e. Acute gastroenteritis    f. Peptic/duodenal ulcer    g. Cholelithiasis
- h. Urticaria    i. Cellulitis    j. Allergy/allergic reaction
- k. Urinary tract infection    l. Urinary calculus

m. Musculoskeletal disorder  
Other 【

n. Psychological disorder  
】

o. No disease

|           |                 |                                    |                                     |
|-----------|-----------------|------------------------------------|-------------------------------------|
| Procedure | Prescription    | <input type="checkbox"/> 0. Absent | <input type="checkbox"/> 1. Present |
|           | Imaging         | <input type="checkbox"/> 0. Absent | <input type="checkbox"/> 1. Present |
|           | Laboratory test | <input type="checkbox"/> 0. Absent | <input type="checkbox"/> 1. Present |
|           | Treatment       | <input type="checkbox"/> 0. Absent | <input type="checkbox"/> 1. Present |
